# Supplementary material
Source: MDPI journal article supplement (https://www.mdpi.com/2073-4395/14/3/488)
Supplement: s1 [file s1]

Archive with 3 entries (3 files):
- agronomy-2878534-Supplementary Figures.pdf
- agronomy-2878534-Supplementary Table S1.pdf
- agronomy-2878534-Supplementary Table S2.pdf
