# Supplementary material
Source: MDPI journal article supplement (https://www.mdpi.com/2073-4395/14/3/488)
Supplement: s1 [file s1]

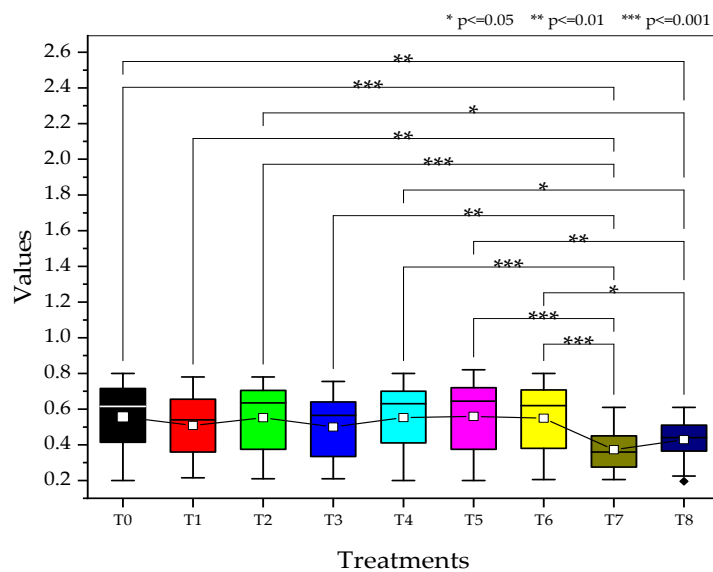

**Figure S1.** Box plots of the manually measured NDVI results. Each box shows the mean, median and distribution of the dataset. Asterisks indicate significant differences (\* $p \leq 0.05$ , \*\* $p \leq 0.01$ , \*\*\* $p \leq 0.001$ ) between treatments at different levels.

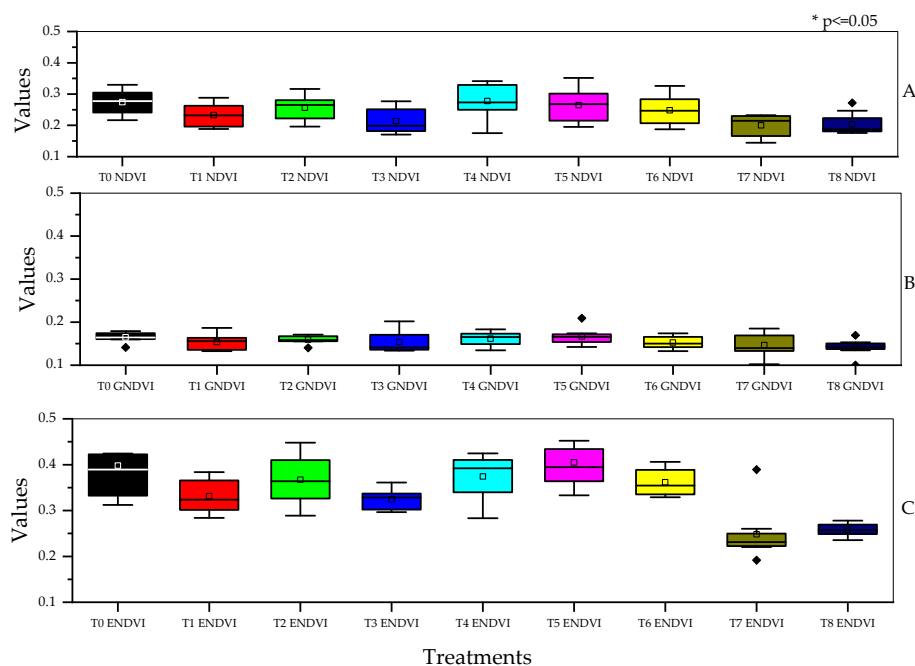

**Figure S2.** Box plots of values of normalized difference vegetation index (NDVI) (A), green normalized difference vegetation index (GNDVI) (B) and enhanced normalized difference vegetation index (ENDVI) (C) obtained from aerial recorded datasets. Each box shows the mean, median and distribution of the dataset.

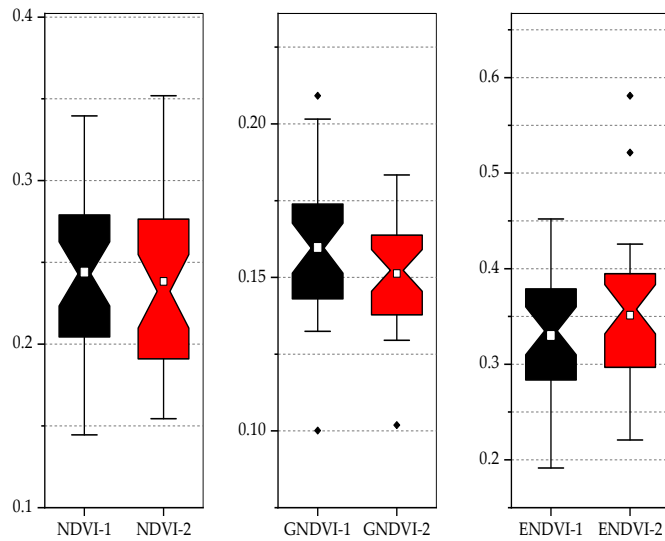

**Figure S3.** Box plots of the NDVI, GNDVI, and ENDVI data in the average of all treatments measured on June 2nd (BBCH 3.4) and on June 24th (BBCH 4.2). Each box shows the mean, and distribution of the dataset. (NDVI-1, GNDVI-1, ENDVI-1 = June 2nd; NDVI-2, GNDVI-2, ENDVI-2 = 24th June).

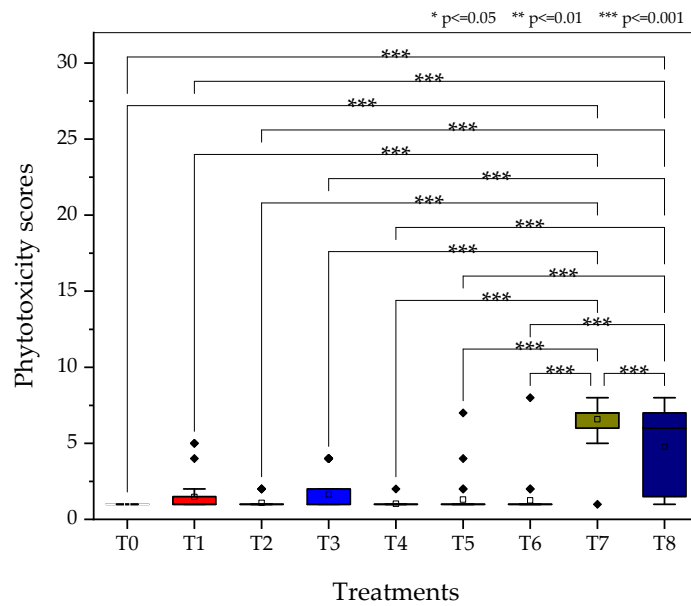

**Figure S4.** Box plots of visually assessed phytotoxicity scores in plots treated by different herbicides. Each box shows the mean, median and, distribution of the dataset. Asterisks indicate significant differences (\*\*\*)  $p < 0.001$  between treatments at different levels.

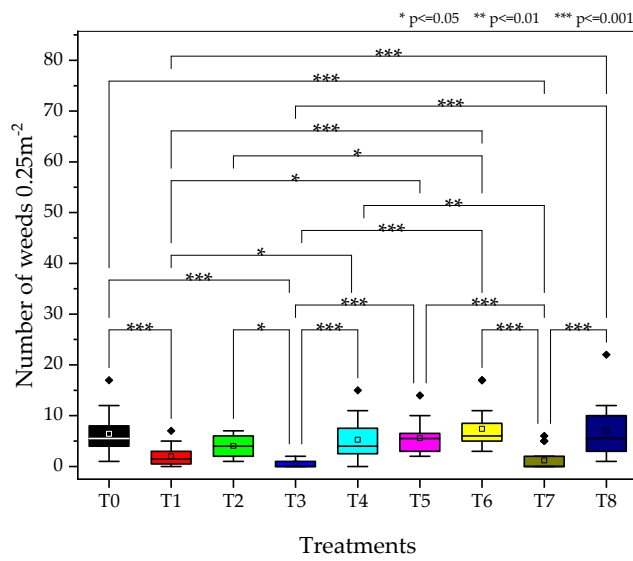

**Figure S5.** Weed control efficiency of herbicides, data presented in the average of each observation. Each box shows the mean, median, and distribution of the dataset. Asterisks indicate significant differences (\*p<0.05, \*\*p<0.01, \*\*\*p<0.001) between treatments at different levels.

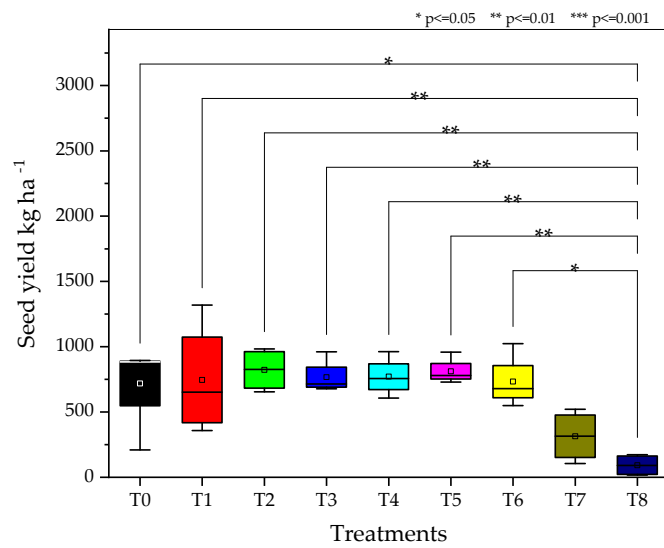

**Figure S6.** Box plots of net seed yields. Each box shows the mean, median, and distribution of the dataset. Asterisks indicate significant differences (\*p<0.05, \*\*p<0.01) between treatments at different levels.

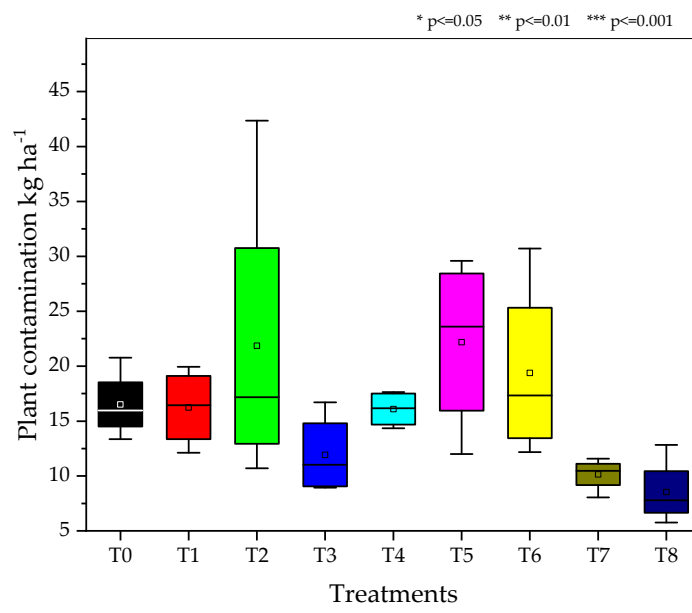

**Figure S7.** The mean of contamination in the seed yield in different treatments. Each box shows the mean, median, and distribution of the dataset.
