# Supplementary material
Source: MDPI journal article supplement (https://www.mdpi.com/2073-4395/14/3/488)
Supplement: s1 [file s1 › agronomy-2878534-Supplementary Table S1.pdf]

**Table S1.** Efficiency of herbicide treatments on the weed control and yield characters and their effects on the phytotoxicity variables.

| Treatments          | NDVI<br>(manually<br>recorded) | NDVI<br>(aerial<br>recorded) | GNDVI<br>(aerial<br>recorded) | ENDVI<br>(aerial<br>recorded) | Phytotoxic<br>ity score* | Number of<br>weeds 0.25<br>m <sup>-2</sup> | Seed yield<br>kg ha <sup>-1</sup> | Yield<br>contamination*<br>*<br>kg ha <sup>-1</sup> | Percentage of<br>plant<br>contamination<br>(%) |
|---------------------|--------------------------------|------------------------------|-------------------------------|-------------------------------|--------------------------|--------------------------------------------|-----------------------------------|-----------------------------------------------------|------------------------------------------------|
| Control (T0)        | 0.556 <sup>a</sup>             | 0.274 <sup>ab</sup>          | 0.165 <sup>a</sup>            | 0.398 <sup>a</sup>            | 1.00 <sup>c</sup>        | 6.40 <sup>ab</sup>                         | 718 <sup>a</sup>                  | 17 <sup>a</sup>                                     | 2.2                                            |
| Flumioxazin (T1)    | 0.508 <sup>ab</sup>            | 0.232 <sup>ab</sup>          | 0.154 <sup>a</sup>            | 0.331 <sup>ab</sup>           | 1.47 <sup>c</sup>        | 2.00 <sup>cde</sup>                        | 745 <sup>a</sup>                  | 16 <sup>a</sup>                                     | 2.1                                            |
| Pendimethalin (T2)  | 0.552 <sup>a</sup>             | 0.256 <sup>ab</sup>          | 0.159 <sup>a</sup>            | 0.367 <sup>a</sup>            | 1.08 <sup>c</sup>        | 4.05 <sup>bcd</sup>                        | 822 <sup>a</sup>                  | 22 <sup>a</sup>                                     | 2.6                                            |
| Dimethenamid-P (T3) | 0.500 <sup>ab</sup>            | 0.214 <sup>ab</sup>          | 0.154 <sup>a</sup>            | 0.324 <sup>abc</sup>          | 1.64 <sup>c</sup>        | 0.55 <sup>e</sup>                          | 767 <sup>a</sup>                  | 12 <sup>a</sup>                                     | 1.5                                            |
| Pethoxamid (T4)     | 0.553 <sup>a</sup>             | 0.278 <sup>a</sup>           | 0.161 <sup>a</sup>            | 0.374 <sup>a</sup>            | 1.03 <sup>c</sup>        | 5.25 <sup>ab</sup>                         | 770 <sup>a</sup>                  | 16 <sup>a</sup>                                     | 2.0                                            |
| Clomazone (T5)      | 0.559 <sup>a</sup>             | 0.265 <sup>ab</sup>          | 0.167 <sup>a</sup>            | 0.405 <sup>a</sup>            | 1.31 <sup>c</sup>        | 5.55 <sup>ab</sup>                         | 812 <sup>a</sup>                  | 22 <sup>a</sup>                                     | 2.7                                            |
| Metobromuron (T6)   | 0.549 <sup>a</sup>             | 0.248 <sup>ab</sup>          | 0.153 <sup>a</sup>            | 0.361 <sup>a</sup>            | 1.25 <sup>c</sup>        | 7.40 <sup>a</sup>                          | 732 <sup>a</sup>                  | 19 <sup>a</sup>                                     | 2.6                                            |
| Metribuzin (T7)     | 0.373 <sup>c</sup>             | 0.200 <sup>c</sup>           | 0.146 <sup>a</sup>            | 0.248 <sup>c</sup>            | 6.58 <sup>a</sup>        | 1.20 <sup>de</sup>                         | 314 <sup>ab</sup>                 | 10 <sup>a</sup>                                     | 3.1                                            |
| Imazamox (T8)       | 0.428 <sup>bc</sup>            | 0.204 <sup>bc</sup>          | 0.141 <sup>a</sup>            | 0.258 <sup>bc</sup>           | 4.78 <sup>b</sup>        | 7.00 <sup>ab</sup>                         | 92 <sup>b</sup>                   | 9 <sup>a</sup>                                      | 8.4                                            |

Different letters in the superscript indicate statistically significant differences ( $p < 0.05$ ) between treatments within a variable. \* A scale of 1 to 9 was used, where 1 indicates symptom-free and 9 indicates completely dead plants (Dancza, 2004). \*\* Weed biomass co-harvested with the crop were considered as yield contamination.
