# Supplementary material
Source: MDPI journal article supplement (https://www.mdpi.com/2073-4395/14/3/488)
Supplement: s1 [file s1 › agronomy-2878534-Supplementary Table S2.pdf]

**Table S2.** Ranking of different herbicides based on the results of experimental tests.

| Treatments          | NDVI<br>manual | NDVI<br>aerial | GNDVI | ENDVI | Phytotoxicity | Weed<br>number | Yield | Ranking Yield<br>contamination | Average<br>rank |
|---------------------|----------------|----------------|-------|-------|---------------|----------------|-------|--------------------------------|-----------------|
| Control (T0)        | 2              | 2              | 2     | 2     | 1             | 7              | 7     | 4                              | 3.4             |
| Flumioxazin (T1)    | 6              | 6              | 5     | 6     | 6             | 3              | 5     | 3                              | 5.0             |
| Pendimethalin (T2)  | 4              | 4              | 4     | 4     | 3             | 4              | 1     | 5                              | 3.6             |
| Dimethenamid-P (T3) | 7              | 7              | 6     | 7     | 7             | 1              | 4     | 1                              | 5.0             |
| Pethoxamid (T4)     | 3              | 1              | 3     | 3     | 2             | 5              | 3     | 2                              | 2.8             |
| Clomazone (T5)      | 1              | 3              | 1     | 1     | 5             | 6              | 2     | 7                              | 3.3             |
| Metobromuron (T6)   | 5              | 5              | 7     | 5     | 4             | 9              | 6     | 6                              | 5.9             |
| Metribuzin (T7)     | 9              | 9              | 8     | 9     | 9             | 2              | 8     | 8                              | 7.8             |
| Imazamox (T8)       | 8              | 8              | 9     | 8     | 8             | 8              | 9     | 9                              | 8.4             |
